# Supplementary material for: Outcomes for patients with severe chronic neutropenia treated with granulocyte colony-stimulating factor
Source: PubMed Central journal article supplement — Blood Adv. 2022 Jul 1;6(13):3861–9. doi: 10.1182/bloodadvances.2021005684 (PMC9278291; doi:10.1182/bloodadvances.2021005684), 2022-07-01
Supplement: advancesADV2021005684-suppl1.pdf [file advancesADV2021005684-suppl1.pdf]

**Supplemental Table 1: Evolution of SCNIR Patients to Lymphoproliferative Disorders**

| <b>Patient #</b> | <b>Diagnosis at Enrollment</b> | <b>FACS*, Pre G-CSF</b>                                    | <b>FACS, Most current, on G-CSF</b>                          | <b>Patient Evolved To:</b>                      |
|------------------|--------------------------------|------------------------------------------------------------|--------------------------------------------------------------|-------------------------------------------------|
| 1                | Idiopathic / Autoimmune        | Monoclonal T cell population detected, T cell predominance | Not Tested                                                   | T-cell Lymphoma Disorder                        |
| 2                | Idiopathic / Autoimmune        | No clonal population detected                              | Clonal T cell receptor gene rearrangement detected           | T-cell Lymphoproliferative Disorder             |
| 3                | Idiopathic / Autoimmune        | Not Tested                                                 | Predominantly T-cells, CD57+                                 | T-cell Lymphoproliferative Disorder             |
| 4                | Idiopathic / Autoimmune        | Not Tested                                                 | Not Tested                                                   | Non Hodgkins Lymphoma                           |
| 5                | Idiopathic / Autoimmune        | Not Tested                                                 | Normal CD8+ cells                                            | Non Hodgkins Lymphoma                           |
| 6                | Idiopathic / Autoimmune        | Not Tested                                                 | Increase CD8+ cells                                          | T-cell Lymphoproliferative Disorder             |
| 7                | Idiopathic / Autoimmune        | T-cell gene rearrangements negative                        | T-cell gene rearrangements negative                          | T-cell Lymphoproliferative Disorder             |
| 8                | Idiopathic / Autoimmune        | Flow negative                                              | No aberrant T cells, NK cells 25%                            | Multiple Myeloma                                |
| 9                | Idiopathic / Autoimmune        | 36% lymphocytes                                            | Increase CD8+ cells                                          | T-cell Lymphoproliferative Disorder             |
| 10               | Idiopathic / Autoimmune        | Not Tested                                                 | Increase CD8+ cells                                          | T-cell Lymphoproliferative Disorder             |
| 11               | Idiopathic / Autoimmune        | No immunophenotypic evidence of clonal cell population     | No immunophenotypic evidence of lymphoproliferative disorder | T-cell Lymphoproliferative Disorder             |
| 12               | Idiopathic / Autoimmune        | Lymphoid aggregates, possible B cell neoplasm              | Not Tested                                                   | Non Hodgkins Lymphoma                           |
| 13               | Lymphoproliferative / LGL†     | Not Tested                                                 | Increase CD8+ cells                                          | Primary diagnosis: Lymphoproliferative Disorder |
| 14               | Lymphoproliferative / LGL      | T cells normal expression                                  | Large # Polyclonal cells, mixed CD4+ and CD8+                | Primary diagnosis: Lymphoproliferative Disorder |
| 15               | Lymphoproliferative / LGL      | Not Tested                                                 | Increase CD8+ cells                                          | Primary diagnosis: Lymphoproliferative Disorder |
| 16               | Lymphoproliferative / LGL      | T-cell clonality detected, clonal rearrangement detected   | Abnormal T cell population                                   | Primary diagnosis: Lymphoproliferative Disorder |

|    |                           |                                                                           |                                                |                                                 |
|----|---------------------------|---------------------------------------------------------------------------|------------------------------------------------|-------------------------------------------------|
| 17 | Lymphoproliferative / LGL | Aberrant CD7+ expression by monocytes                                     | Not Tested                                     | Primary diagnosis: Lymphoproliferative Disorder |
| 18 | Lymphoproliferative / LGL | Not Tested                                                                | T-NK cells, CD8+ cells                         | Primary diagnosis: Lymphoproliferative Disorder |
| 19 | Lymphoproliferative / LGL | Not Tested                                                                | Increase CD8+ cells                            | Primary diagnosis: Lymphoproliferative Disorder |
| 20 | Lymphoproliferative / LGL | T-cell gene rearrangements positive                                       | T-cell clonality detected, Increase CD8+ cells | Primary diagnosis: Lymphoproliferative Disorder |
| 21 | Lymphoproliferative / LGL | Flow consistent with LGL / T suppressor cell lymphoproliferative disorder | Not Tested                                     | Primary diagnosis: Lymphoproliferative Disorder |
| 22 | Lymphoproliferative / LGL | Not Tested                                                                | Not Tested                                     | Primary diagnosis: Lymphoproliferative Disorder |
| 23 | Lymphoproliferative / LGL | Not Tested                                                                | Not Tested                                     | Non Hodgkins Lymphoma                           |
| 24 | Lymphoproliferative / LGL | Not Tested                                                                | 30% T8 cells                                   | Primary diagnosis: Lymphoproliferative Disorder |

\*FACS – Fluorescence-activated cell sorter

†LGL – Large granular lymphocyte syndrome
